# Supplementary material for: METTL14-mediated Lnc-LSG1 m6A modification inhibits clear cell renal cell carcinoma metastasis via regulating ESRP2 ubiquitination
Source: PubMed Central journal article supplement (PMC8738955; doi:10.1016/j.omtn.2021.12.024), 2021-12-17
Supplement: mmc1.pdf [file mmc1.pdf]

**Supplemental information**

**METTTL14-mediated Lnc-LSG1 m6A modification**

**inhibits clear cell renal cell carcinoma**

**metastasis via regulating ESRP2 ubiquitination**

**Danyang Shen, Lifeng Ding, Zeyi Lu, Ruyue Wang, Chenhao Yu, Huan Wang, Qiming Zheng, Xuliang Wang, Wanjiang Xu, Haifeng Yu, Liwei Xu, Mingchao Wang, Shicheng Yu, Shibin Zhu, Jun Qian, Liqun Xia, and Gonghui Li**

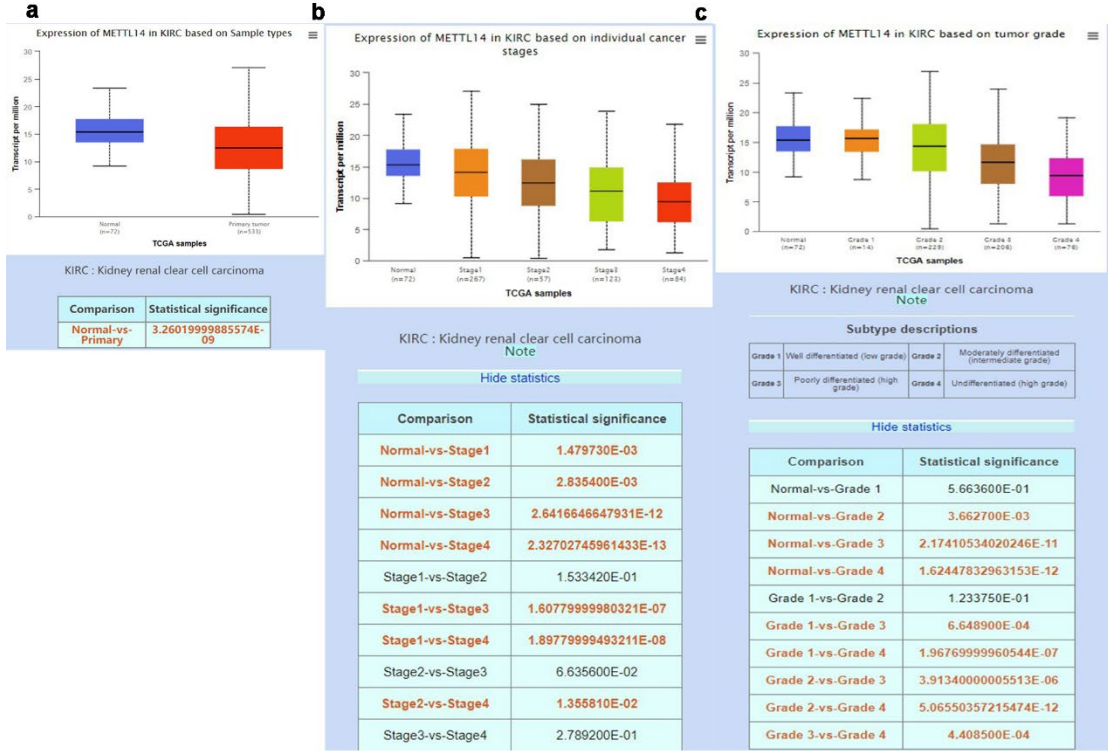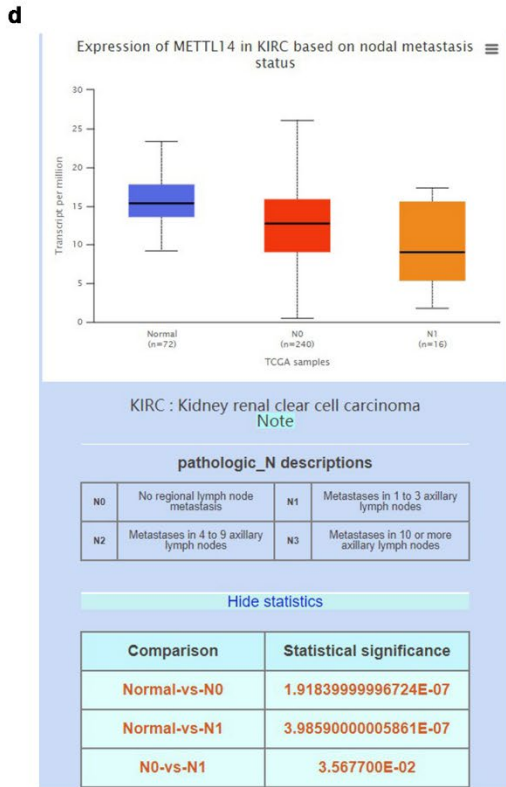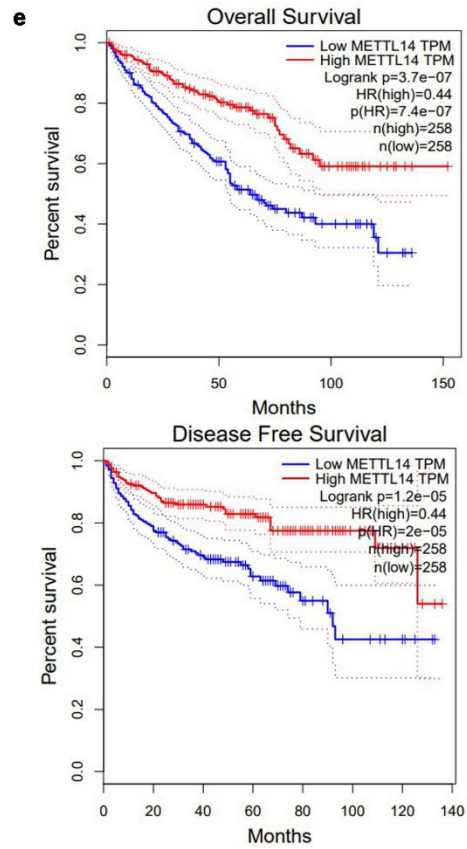

**Figure S1.** (a), (b), (c). According to the UALCAN database, METTL14 was downregulated in the ccRCC primary tumor when compared to normal tissues (a). The higher the tumor stage (b) and grade (c), the lower the METTL14 expression. (d). METTL14 expression was lower in metastatic ccRCC tissues than that in non-metastatic tissues. (d). Kaplan-Meier analysis in the GEPIA database showed that lower METTL14 expression is associated with poorer OS and DFS. All these data were obtained on 03/16/2021. Data were presented as the mean  $\pm$  SD of at least three independent experiments.

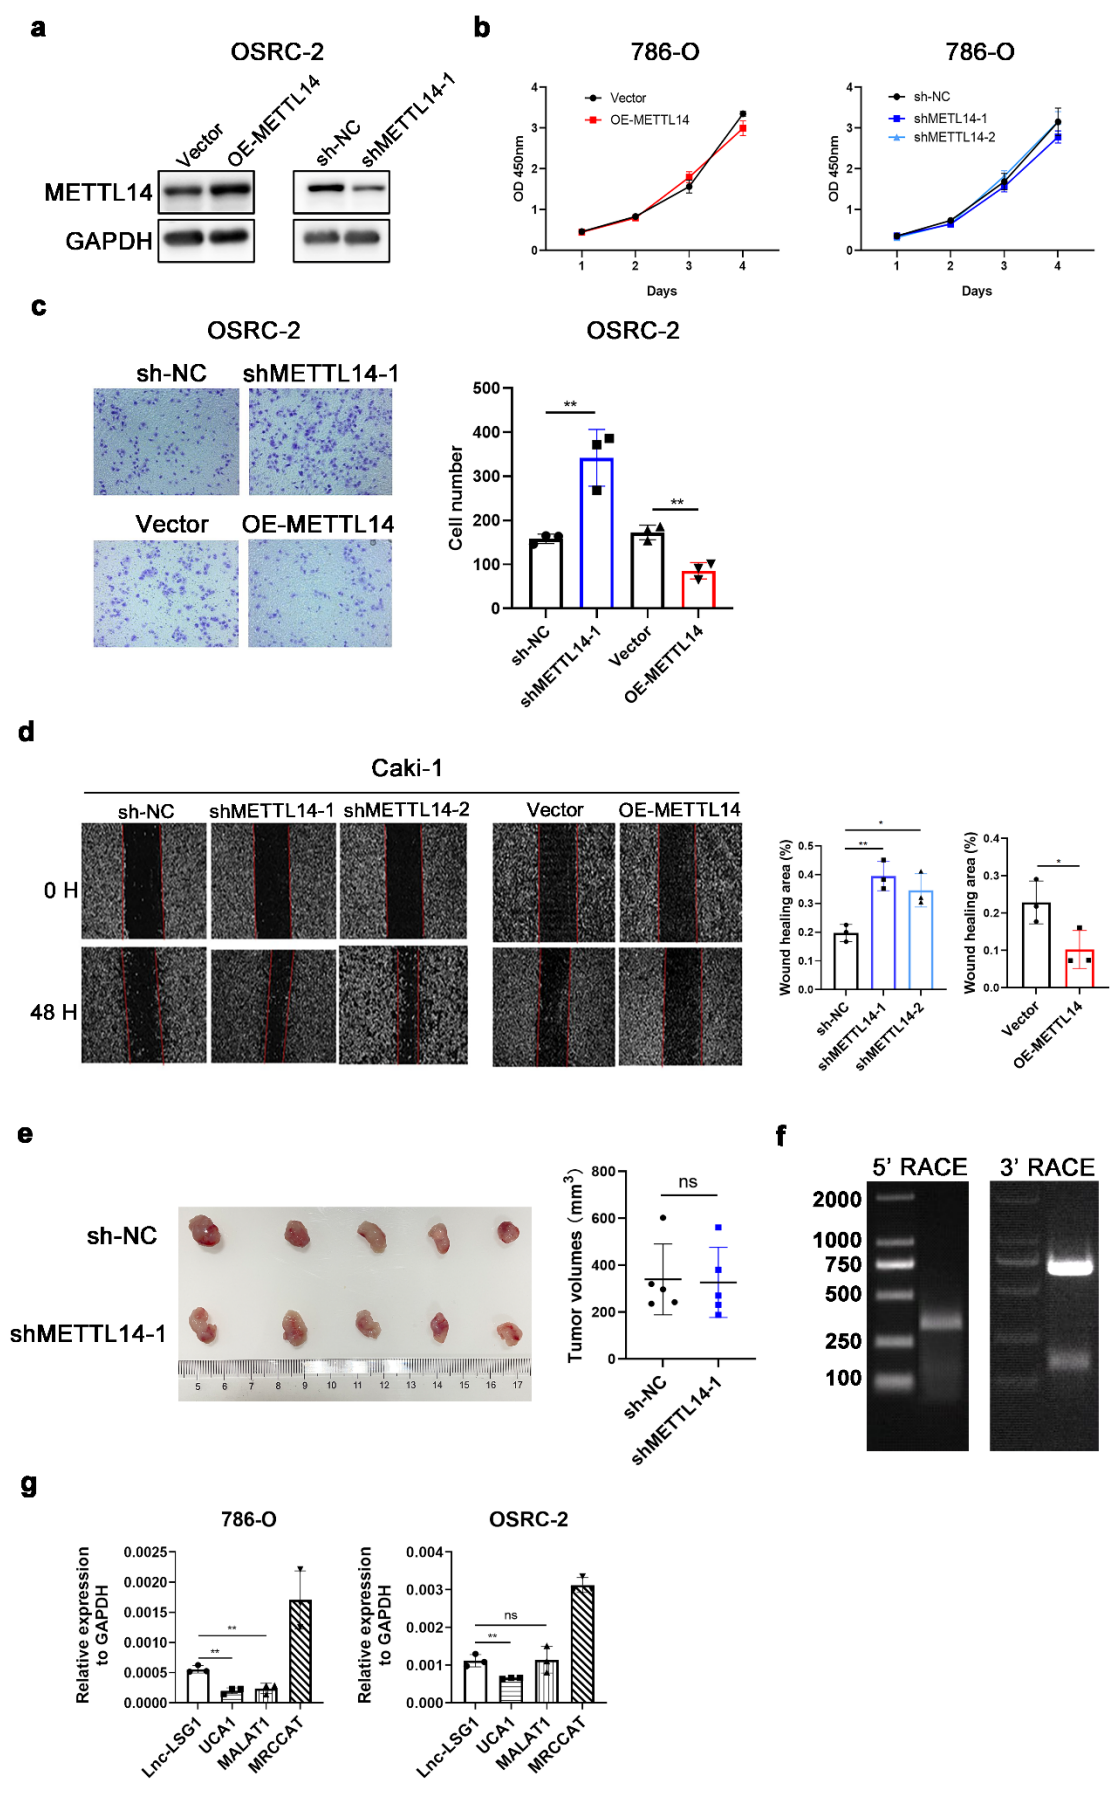

**h**

| ID       | Label     | Coding probability | Peptide length(aa) | Fickett score | Isoelectric point | ORF integrity |
|----------|-----------|--------------------|--------------------|---------------|-------------------|---------------|
| Lnc-LSG1 | noncoding | 0.0318156          | 64                 | 0.3284        | 8.90765380859     | complete      |

**i**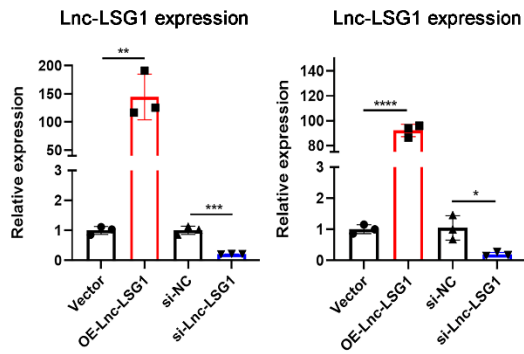**k**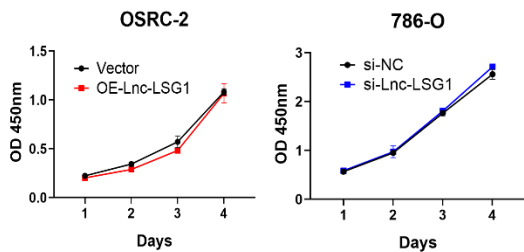**j**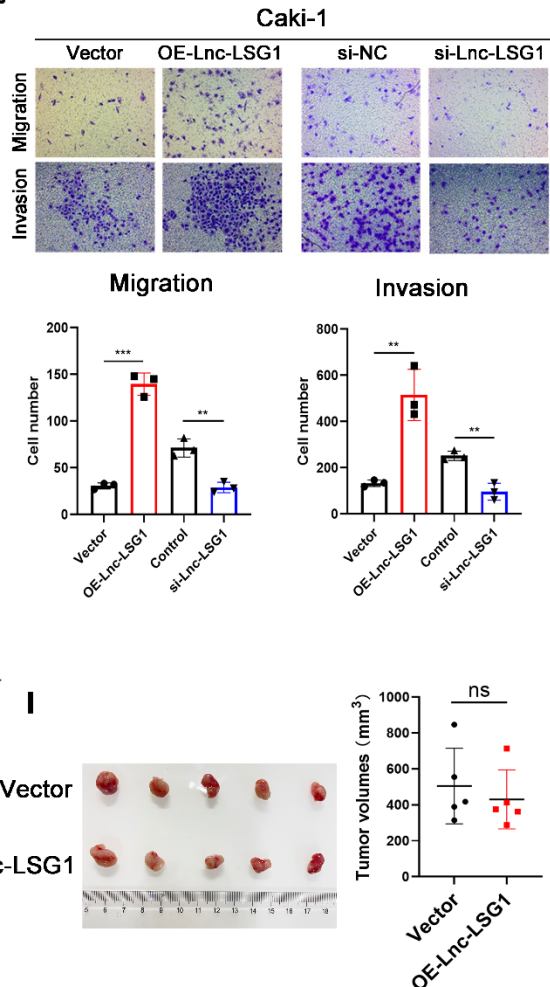

**Figure S2** (a). METTL14 knockdown and overexpression were confirmed by western blot assay in OSRC-2 cells. (b). METTL14 cannot regulate 786-O proliferation. (c). Transwell assay showed that METTL14 inhibits OSRC-2 migration. (d). Wound healing assay were performed to detect the migratory and invasive abilities of Caki-1 cells after METTL14 depletion and overexpression. Magnification, 100 $\times$ . (e). The mice were sacrificed and tumor volume was measured after 4 weeks OSRC-2 cells injection. Left panel: Image of the xenograft tumors from sh-NC and sh-METTL14-1 group. Right panel: Average tumor volume with SD (n = 5 per group). (f). 5' and 3'

RACE assays in 786-O cells detected the whole sequence of Lnc-LSG1. The figure showed PCR products from the 5'-RACE and 3'-RACE assays. (g). The expression of Lnc-LSG1 and some highly expressed lncRNAs in ccRCC cells. (h). Protein coding potential of Lnc-LSG1-4:2 as predicted by CPC 2.0. (i). Lnc-LSG1 knockdown and overexpression were confirmed by RT-qPCR assay. (j). Transwell assay showed the regulatory effect of Lnc-LSG1 on Caki-1 migration and invasion. (k). CCK8 assay showed Lnc-LSG1 has no effect on cell proliferation. (l). The mice were sacrificed and tumor volume was measured after 4 weeks OSRC-2 cells injection. Left panel: Image of the xenograft tumors from Vector and OE-Lnc-LSG1 group. Right panel: Average tumor volume with SD (n = 5 per group). \*P < 0.05, \*\*P < 0.01, \*\*\*P < 0.001, \*\*\*\*P < 0.0001. ns: no significance. Data were presented as the mean  $\pm$  SD of at least three independent experiments.

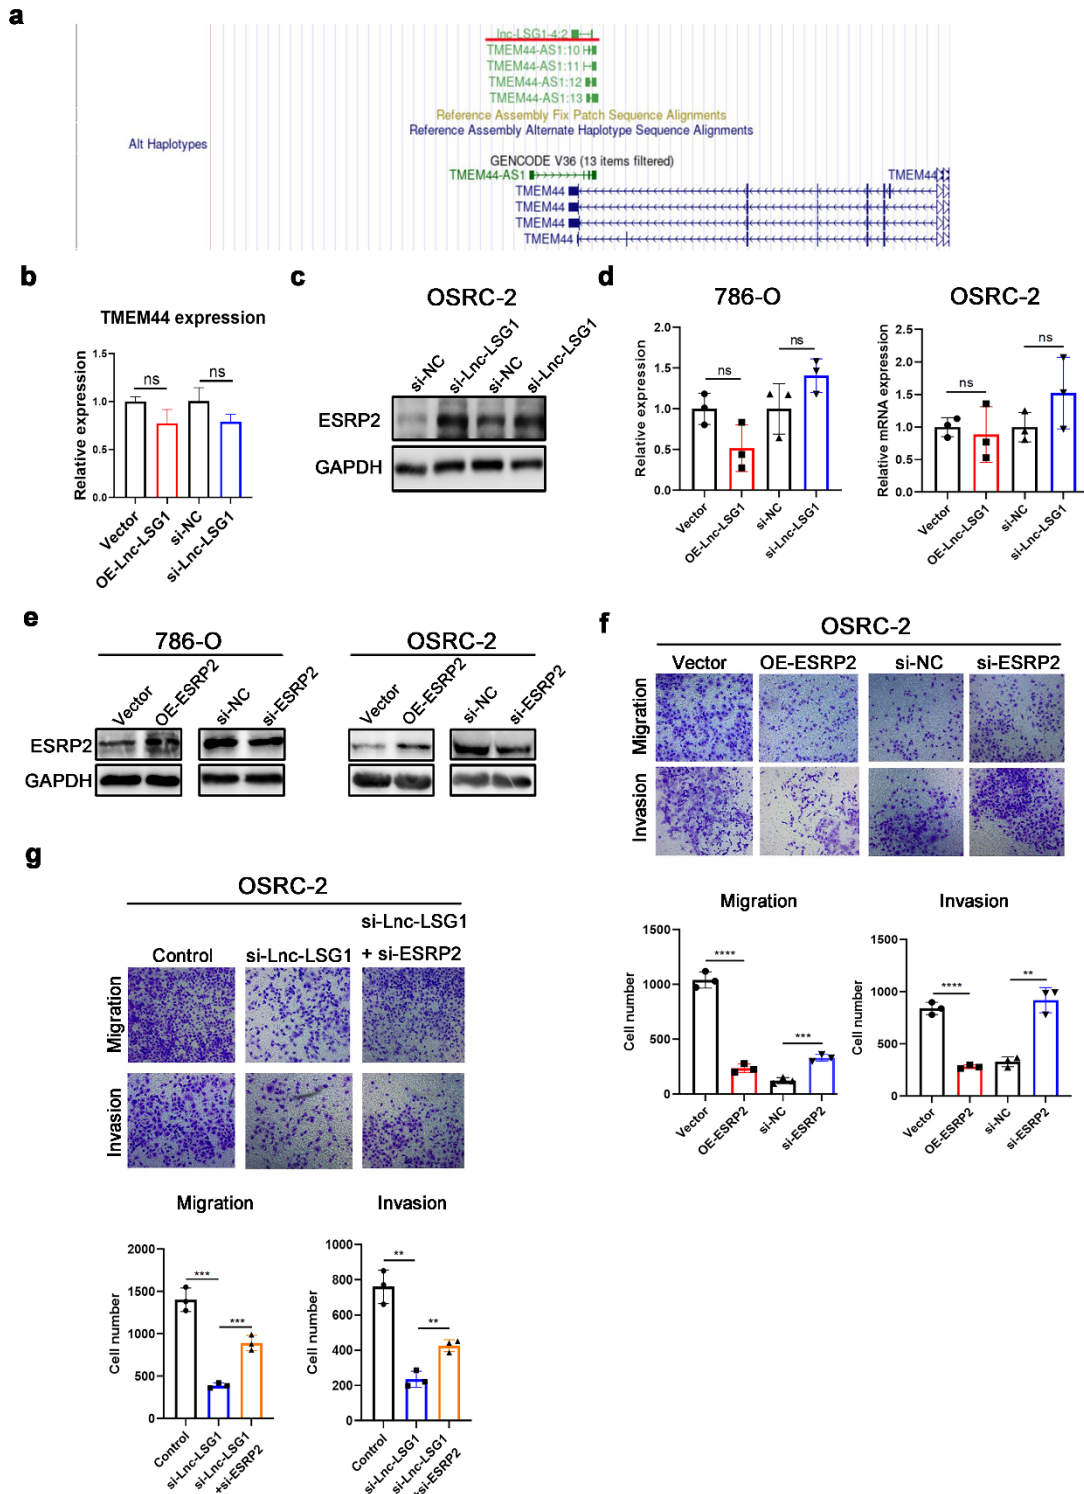

**Figure S3.** (a). The location of Lnc-LSG1-4:2 was retrieved by the UCSC

(<http://genome.ucsc.edu/>) database. These data were obtained on 03/16/2021. (b).

Lnc-LSG1 showed no effect on TMEM44 mRNA expression. (c). si-Lnc-LSG1 can

increase ESRP2 protein level. (d). Lnc-LSG1 showed no effect on ESRP2 mRNA

expression. (e). Knockdown and overexpression ESRP2 were confirmed by western blot assay. (f). Transwell assay showed that ESRP2 can inhibit the migration and invasion of OSRC-2 cells. (g). si-ESRP2 can rescue the inhibited migratory and invasive ability of OSRC-2 cells induced by si-Lnc-LSG1. ns: no significance. \*P < 0.05, \*\*P < 0.01, \*\*\*P < 0.001, \*\*\*\*P < 0.0001, ns: no significance. Data were presented as the mean  $\pm$  SD of at least three independent experiments.



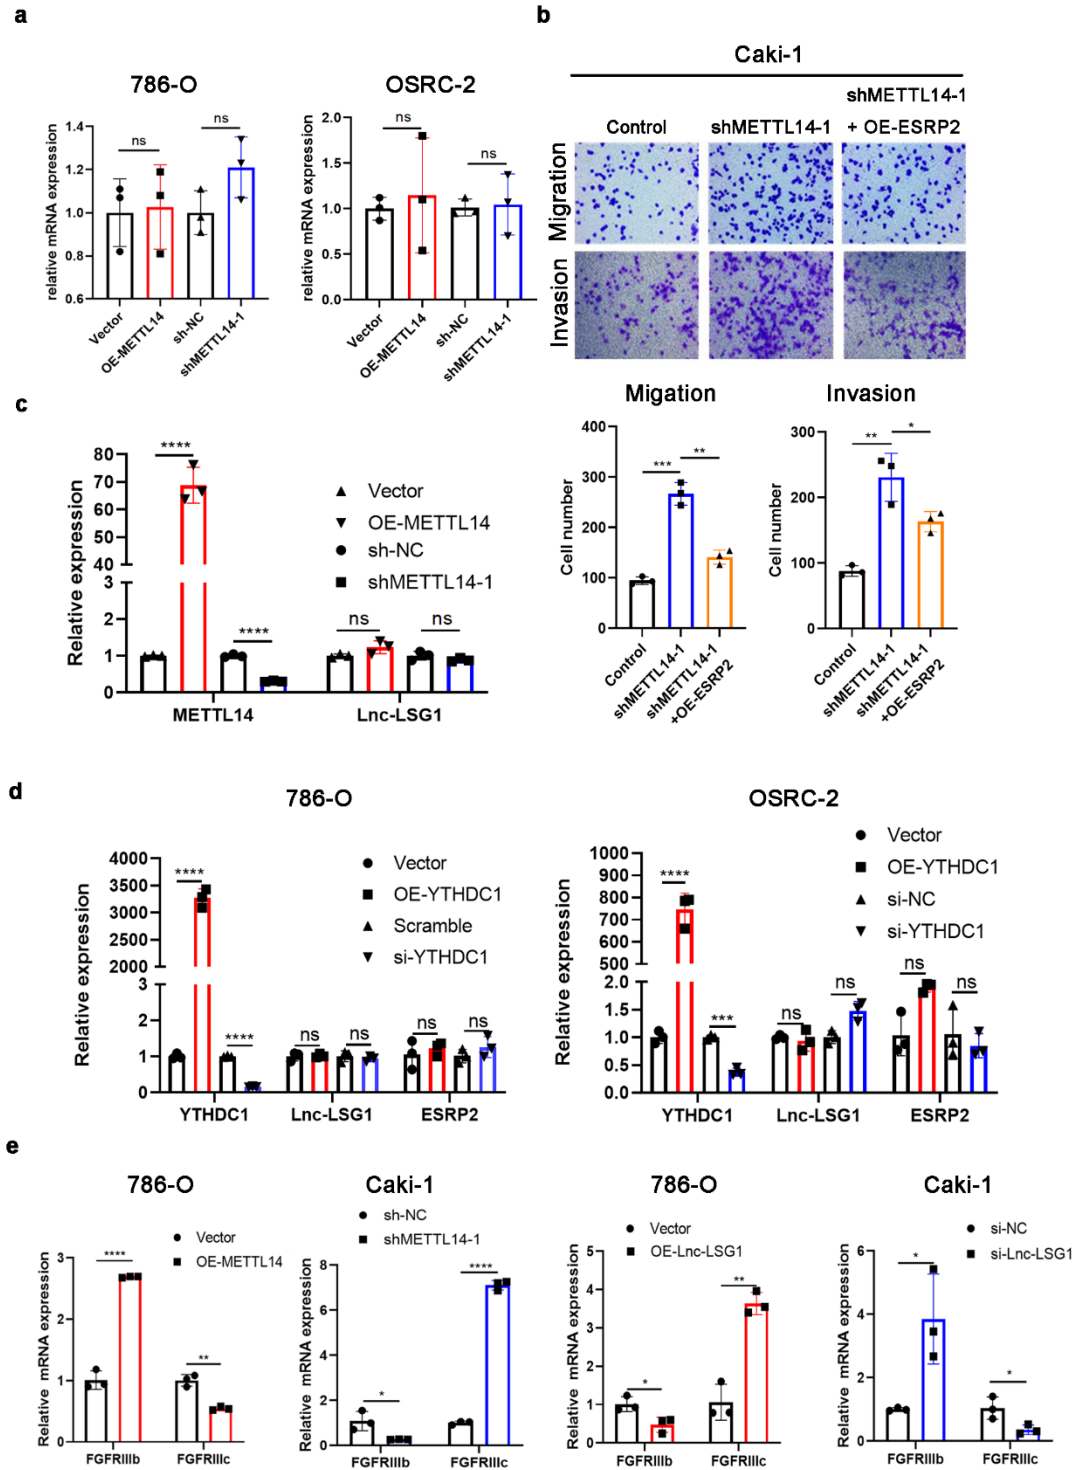

**Figure S4** (a). RT-qPCR assay showed that METTL14 cannot regulate ESRP2 mRNA expression. (b). ESRP2 overexpression can reverse the enhanced migration and invasion of Caki-1 cells induced by shMETTL14-1. (c). METTL14 cannot regulate Lnc-LSG1 expression. (d). YTHDC1 cannot regulate Lnc-LSG1 and ESRP2 mRNA

expression. (e). RT-qPCR assay revealed the regulatory effect of METTL14 and Lnc-LSG1 on FGFR2 IIIb and FGFR2IIIc. \*P < 0.05, \*\*P < 0.01, \*\*\*P < 0.001, \*\*\*\*P<0.0001, ns: no significance. Data were presented as the mean  $\pm$  SD of at least three independent experiments.

**Table S1. Information of patients from Sir Run Run Shaw Hospital (RT-qPCR samples)**

| NO | Gender | Age | Metastasis | Pathology | Stage | Grade | T  | N | M |
|----|--------|-----|------------|-----------|-------|-------|----|---|---|
| 1  | Male   | 48  | no         | ccRCC     | I     | 2     | 1b | 0 | 0 |
| 2  | Male   | 56  | no         | ccRCC     | III   | 3     | 3a | 0 | 0 |
| 3  | Male   | 84  | no         | ccRCC     | I     | 2     | 1b | 0 | 0 |
| 4  | Male   | 54  | no         | ccRCC     | II    | 3     | 2a | 0 | 0 |
| 5  | Male   | 81  | no         | ccRCC     | I     | 3     | 1a | 0 | 0 |
| 6  | Male   | 76  | no         | ccRCC     | I     | 3     | 1a | 0 | 0 |
| 7  | Male   | 50  | no         | ccRCC     | I     | 2     | 1a | 0 | 0 |
| 8  | Male   | 71  | no         | ccRCC     | I     | 3     | 1b | 0 | 0 |
| 9  | Male   | 59  | no         | ccRCC     | I     | 2     | 1a | 0 | 0 |
| 10 | Male   | 55  | no         | ccRCC     | II    | 3     | 2a | 0 | 0 |
| 11 | Female | 75  | no         | ccRCC     | I     | 2     | 1b | 0 | 0 |
| 12 | Male   | 72  | no         | ccRCC     | I     | 3     | 1a | 0 | 0 |
| 13 | Female | 73  | no         | ccRCC     | I     | 2     | 1b | 0 | 0 |
| 14 | Male   | 60  | no         | ccRCC     | I     | 3     | 1a | 0 | 0 |
| 15 | Male   | 37  | no         | ccRCC     | I     | 2     | 1a | 0 | 0 |
| 16 | Male   | 70  | no         | ccRCC     | I     | 3     | 1a | 0 | 0 |
| 17 | Male   | 41  | no         | ccRCC     | II    | 2     | 2b | 0 | 0 |
| 18 | Male   | 57  | no         | ccRCC     | I     | 3     | 1a | 0 | 0 |
| 19 | Male   | 60  | no         | ccRCC     | I     | 3     | 1a | 0 | 0 |
| 20 | Female | 45  | no         | ccRCC     | II    | 3     | 2a | 0 | 0 |
| 21 | Male   | 42  | no         | ccRCC     | I     | 3     | 1a | 0 | 0 |
| 22 | Male   | 54  | no         | ccRCC     | I     | 2     | 1b | 0 | 0 |
| 23 | Male   | 49  | no         | ccRCC     | I     | 2     | 1a | 0 | 0 |
| 24 | Female | 56  | no         | ccRCC     | II    | 2     | 2a | 0 | 0 |
| 25 | Female | 70  | no         | ccRCC     | I     | 2     | 1b | 0 | 0 |
| 26 | Female | 61  | no         | ccRCC     | I     | 2     | 1b | 0 | 0 |
| 27 | Male   | 69  | no         | ccRCC     | I     | 2     | 1b | 0 | 0 |
| 28 | Male   | 32  | no         | ccRCC     | I     | 2     | 1a | 0 | 0 |
| 29 | Male   | 81  | no         | ccRCC     | I     | 2     | 1b | 0 | 0 |
| 30 | Female | 52  | no         | ccRCC     | I     | 2     | 1a | 0 | 0 |
| 31 | Male   | 79  | no         | ccRCC     | I     | 3     | 1a | 0 | 0 |
| 32 | Male   | 31  | no         | ccRCC     | I     | 2     | 1b | 0 | 0 |
| 33 | Female | 85  | no         | ccRCC     | I     | 2     | 1b | 0 | 0 |
| 34 | Male   | 56  | no         | ccRCC     | I     | 2     | 1a | 0 | 0 |
| 35 | Male   | 46  | no         | ccRCC     | I     | 2     | 1a | 0 | 0 |
| 36 | Female | 55  | no         | ccRCC     | I     | 2     | 1a | 0 | 0 |
| 37 | Male   | 70  | no         | ccRCC     | I     | 2     | 1a | 0 | 0 |
| 38 | Female | 79  | no         | ccRCC     | I     | 2     | 1b | 0 | 0 |
| 39 | Male   | 63  | no         | ccRCC     | I     | 2     | 1b | 0 | 0 |
| 40 | Male   | 56  | no         | ccRCC     | I     | 2     | 1a | 0 | 0 |
| 41 | Male   | 37  | no         | ccRCC     | I     | 2     | 1b | 0 | 0 |
| 42 | Male   | 72  | no         | ccRCC     | I     | 2     | 1b | 0 | 0 |
| 43 | Male   | 40  | no         | ccRCC     | I     | 2     | 1a | 0 | 0 |
| 44 | Male   | 64  | no         | ccRCC     | II    | 2     | 2a | 0 | 0 |
| 45 | Female | 52  | no         | ccRCC     | I     | 2     | 1a | 0 | 0 |
| 46 | Male   | 58  | no         | ccRCC     | I     | 2     | 1a | 0 | 0 |
| 47 | Male   | 57  | no         | ccRCC     | I     | 2     | 1a | 0 | 0 |
| 48 | Male   | 60  | no         | ccRCC     | I     | 3     | 1a | 0 | 0 |
| 49 | Female | 73  | no         | ccRCC     | I     | 2     | 1b | 0 | 0 |
| 50 | Female | 51  | no         | ccRCC     | I     | 2     | 1a | 0 | 0 |

**Table S2. Information of patients from Sir Run Run Shaw Hospital (IHC samples)**

| NO | Gender | Age | Metastasis | Pathology | Stage | Grade | Tumor Size (cm) | T   | N  | M  |
|----|--------|-----|------------|-----------|-------|-------|-----------------|-----|----|----|
| 1  | M      | 60  | no         | ccRCC     | II    | I     | 8*5             | T2a | NO | M0 |
| 2  | F      | 52  | no         | ccRCC     | I     | IV    | 4.8*4.5         | T1b | NO | M0 |
| 3  | M      | 71  | no         | ccRCC     | I     | II    | 4*3*3           | T1a | NO | M0 |
| 4  | F      | 51  | no         | ccRCC     | I     | II    | 3*2.5*1.7       | T1a | NO | M0 |
| 5  | M      | 42  | no         | ccRCC     | II    | III   | 8.3*8*5.5       | T2a | NO | M0 |
| 6  | M      | 60  | no         | ccRCC     | I     | II    | 4*3.7           | T1a | NO | M0 |
| 7  | F      | 60  | no         | ccRCC     | I     | II    | 3.5*3.5         | T1a | NO | M0 |
| 8  | M      | 62  | no         | ccRCC     | I     | III   | 2.3*2.2         | T1a | NO | M0 |
| 9  | F      | 70  | no         | ccRCC     | I     | III   | 3.8*3.5         | T1a | NO | M0 |
| 10 | M      | 43  | no         | ccRCC     | I     | II    | 7*4.7           | T1b | NO | M0 |
| 11 | M      | 60  | no         | ccRCC     | I     | III   | 3*3             | T1a | NO | M0 |
| 12 | M      | 33  | no         | ccRCC     | I     | IV    | 5.7*4           | T1b | NO | M0 |
| 13 | M      | 52  | no         | ccRCC     | I     | II    | 1.8*1.6         | T1a | NO | M0 |
| 14 | M      | 51  | no         | ccRCC     | I     | II    | 3.5*3           | T1a | NO | M0 |
| 15 | F      | 50  | no         | ccRCC     | I     | I     | 1.2*1           | T1a | NO | M0 |
| 16 | M      | 59  | no         | ccRCC     | I     | II    | 2.2*1.8         | T1a | NO | M0 |
| 17 | M      | 79  | no         | ccRCC     | I     | III   | 4.5*4           | T1b | NO | M0 |
| 18 | M      | 50  | no         | ccRCC     | I     | III   | 5.1*3.4         | T1b | NO | M0 |
| 19 | F      | 67  | no         | ccRCC     | I     | II    | 2.2*1.6         | T1a | NO | M0 |
| 20 | F      | 73  | no         | ccRCC     | I     | III   | 7*5.8           | T1b | NO | M0 |
| 21 | M      | 43  | no         | ccRCC     | I     | I     | 3.7*3.5         | T1a | NO | M0 |
| 22 | M      | 44  | no         | ccRCC     | I     | II    | 3.8*3.5         | T1a | NO | M0 |
| 23 | M      | 40  | no         | ccRCC     | I     | III   | 2.6*2.2*1.7     | T1a | NO | M0 |
| 24 | F      | 55  | no         | ccRCC     | I     | I     | 1.2*1.2         | T1a | NO | M0 |
| 25 | F      | 28  | no         | ccRCC     | I     | II    | 6.2*5.8         | T1b | NO | M0 |
| 26 | M      | 56  | no         | ccRCC     | I     | II    | 6.3*5.1         | T1b | NO | M0 |
| 27 | M      | 60  | no         | ccRCC     | I     | II    | 2.7*2.4         | T1a | NO | M0 |
| 28 | M      | 70  | no         | ccRCC     | I     | III   | 1.7*1.6         | T1a | NO | M0 |
| 29 | F      | 57  | no         | ccRCC     | I     | II    | 6*4.5*3.5       | T1b | NO | M0 |
| 30 | M      | 54  | no         | ccRCC     | I     | II    | 5.3*3           | T1b | NO | M0 |
| 31 | M      | 34  | no         | ccRCC     | I     | I     | 1.2*1.2         | T1a | NO | M0 |
| 32 | F      | 74  | no         | ccRCC     | I     | II    | 5*3.2           | T1b | NO | M0 |
| 33 | M      | 43  | no         | ccRCC     | I     | II    | 2.6*1.8         | T1a | NO | M0 |
| 34 | M      | 45  | no         | ccRCC     | I     | II    | 1.8*1.8         | T1a | NO | M0 |
| 35 | M      | 64  | no         | ccRCC     | I     | II    | 3.2*2.4         | T1a | NO | M0 |
| 36 | F      | 46  | no         | ccRCC     | II    | II    | 7.2*6.5         | T2a | NO | M0 |
| 37 | F      | 51  | no         | ccRCC     | I     | II    | 3.3*3           | T1a | NO | M0 |
| 38 | M      | 54  | no         | ccRCC     | I     | II    | 2.5*2           | T1a | NO | M0 |
| 39 | M      | 66  | no         | ccRCC     | II    | IV    | 9*7.5           | T2a | NO | M0 |
| 40 | F      | 71  | no         | ccRCC     | I     | II    | 4.5*4           | T1b | NO | M0 |

Table S3. Information of patients from tissue microarray

| NO | Gender | Age | Metastasis | Pathology | Stage | Grade | Tumor Size (cm) | T   | N  | M  | Survival time (month) | Status |
|----|--------|-----|------------|-----------|-------|-------|-----------------|-----|----|----|-----------------------|--------|
| 1  | F      | 52  | no         | ccRCC     | I     | II    | 6.5×6×5         | T1b | NO | MO | 15.4                  | Dead   |
| 2  | M      | 56  | no         | ccRCC     | III   | I     | 3.5×3×3         | T3a | NO | MO | 97.8                  | Alive  |
| 3  | F      | 73  | no         | ccRCC     | I     | I     | 5×5×4           | T1b | NO | MO | 59.20                 | Alive  |
| 4  | M      | 55  | no         | ccRCC     | I     | II    | 5×4×4           | T1b | NO | MO | 97.34                 | Alive  |
| 5  | M      | 59  | no         | ccRCC     | I     | II    | 5.5×5×5         | T1b | NO | MO | 97.34                 | Alive  |
| 6  | M      | 69  | no         | ccRCC     | I     | II    | 4.5×4×4         | T1b | NO | MO | 97.11                 | Alive  |
| 7  | M      | 72  | no         | ccRCC     | II    | I     | 10×6×5          | T2a | NO | MO | 93.9                  | Alive  |
| 8  | M      | 59  | no         | ccRCC     | II    | II    | 15×9×6.5        | T2b | NO | MO | 7.2                   | Dead   |
| 9  | M      | 63  | no         | ccRCC     | I     | II    | 7×5×3.5         | T1b | NO | MO | 95.93                 | Alive  |
| 10 | F      | 52  | no         | ccRCC     | I     | II    | 7×7×6           | T1b | NO | MO | 95.64                 | Alive  |
| 11 | M      | 67  | no         | ccRCC     | I     | I     | 2.8×2.5×2.5     | T1a | NO | MO | 95.51                 | Alive  |
| 12 | M      | 66  | no         | ccRCC     | II    | II    | 8×8×7           | T2a | NO | MO | 95.41                 | Alive  |
| 13 | F      | 57  | no         | ccRCC     | II    | II    | 8×7×5.5         | T2a | NO | MO | 56.1                  | Dead   |
| 14 | M      | 57  | no         | ccRCC     | III   | IV    | 12×8.5×7        | T3b | NO | MO | 5.6                   | Dead   |
| 15 | M      | 61  | no         | ccRCC     | I     | II    | 7×5×5           | T1b | NO | MO | 95.02                 | Alive  |
| 16 | F      | 79  | no         | ccRCC     | I     | II    | 3×3×2.5         | T1a | NO | MO | 22.5                  | Dead   |
| 17 | F      | 49  | no         | ccRCC     | I     | I     | 1.2×1×0.8       | T1a | NO | MO | 94.03                 | Alive  |
| 18 | F      | 72  | no         | ccRCC     | I     | II    | 6×5.5×5         | T1b | NO | MO | 93.38                 | Alive  |
| 19 | F      | 64  | no         | ccRCC     | I     | II    | 3×3×3           | T1a | NO | MO | 92.75                 | Alive  |
| 20 | M      | 38  | no         | ccRCC     | I     | I     | 2.5×2×2         | T1a | NO | MO | 92.69                 | Alive  |
| 21 | M      | 58  | no         | ccRCC     | I     | II    | 4.5×4×3         | T1b | NO | MO | 92.00                 | Alive  |
| 22 | F      | 61  | no         | ccRCC     | I     | II    | 5×4.5×4         | T1b | NO | MO | 91.93                 | Alive  |
| 23 | M      | 60  | no         | ccRCC     | II    | III   | 9×8×6           | T2a | NO | MO | 91.57                 | Alive  |
| 24 | M      | 55  | no         | ccRCC     | I     | III   | 4×3.5×3.5       | T1a | NO | MO | 91.51                 | Alive  |
| 25 | M      | 75  | no         | ccRCC     | III   | III   | 4×3.5×3         | T3a | NO | MO | 91.5                  | Alive  |
| 26 | F      | 63  | no         | ccRCC     | I     | II    | 3.5×2.5×2       | T1a | NO | MO | 91.15                 | Alive  |
| 27 | F      | 45  | no         | ccRCC     | II    | II    | 8×7×6           | T2a | NO | MO | 90.92                 | Alive  |
| 28 | M      | 51  | no         | ccRCC     | I     | II    | 2×2×1.5         | T1a | NO | MO | 90.79                 | Alive  |
| 29 | M      | 40  | no         | ccRCC     | I     | II    | 6×3.5×3.5       | T1b | NO | MO | 90.13                 | Alive  |
| 30 | M      | 78  | no         | ccRCC     | I     | III   | 5×5×4.5         | T1b | NO | MO | 90.00                 | Alive  |
| 31 | M      | 53  | no         | ccRCC     | I     | I     | 7×6×5           | T1b | NO | MO | 89.93                 | Alive  |
| 32 | F      | 61  | no         | ccRCC     | I     | II    | 5×4×4           | T1b | NO | MO | 89.41                 | Alive  |
| 33 | M      | 61  | no         | ccRCC     | III   | II    | 8×8×6           | T3a | NO | MO | 88.6                  | Alive  |
| 34 | M      | 62  | no         | ccRCC     | I     | II    | 7×6×5           | T1b | NO | MO | 88.52                 | Alive  |
| 35 | M      | 63  | no         | ccRCC     | I     | II    | 7×6×4           | T1b | NO | MO | 98.9                  | Alive  |
| 36 | F      | 60  | no         | ccRCC     | I     | II    | 6×6×5           | T1b | NO | MO | 87.21                 | Alive  |
| 37 | M      | 64  | no         | ccRCC     | III   | III   | 7×6×6           | T3b | N1 | MO | 7.8                   | Dead   |
| 38 | M      | 60  | no         | ccRCC     | II    | III   | 8×7×6           | T2a | NO | MO | 43.9                  | Dead   |
| 39 | M      | 60  | no         | ccRCC     | I     | II    | 4×3.5×3.5       | T1a | NO | MO | 86.92                 | Alive  |
| 40 | F      | 33  | no         | ccRCC     | I     | II    | 2.5×2.5×2       | T1a | NO | MO | 86.69                 | Alive  |
| 41 | M      | 67  | no         | ccRCC     | III   | II    | 7×5.5×4         | T3a | NO | MO | 59.4                  | Dead   |
| 42 | M      | 55  | no         | ccRCC     | I     | I     | 5×4×4           | T1b | NO | MO | 86.33                 | Alive  |
| 43 | M      | 52  | no         | ccRCC     | I     | I     | 6.5×5.5×5.5     | T1b | NO | MO | 86.33                 | Alive  |
| 44 | M      | 57  | no         | ccRCC     | I     | I     | 6×5.5×          | T1b | NO | MO | 86.33                 | Alive  |
| 45 | M      | 52  | no         | ccRCC     | I     | I     | 5×4×3.5         | T1b | NO | MO | 86.30                 | Alive  |
| 46 | M      | 60  | no         | ccRCC     | III   | IV    | 7×7×6           | T3a | NO | MO | 8.6                   | Dead   |
| 47 | M      | 64  | no         | ccRCC     | II    | II    | 10×10×7         | T2a | NO | MO | 20.6                  | Dead   |
| 48 | M      | 65  | no         | ccRCC     | III   | IV    | 5.5×5×4.5       | T3a | NO | MO | 9.5                   | Dead   |
| 49 | F      | 75  | no         | ccRCC     | I     | I     | 5×4.5×4         | T1b | NO | MO | 84.69                 | Alive  |
| 50 | F      | 61  | no         | ccRCC     | III   | IV    | 12×10×7         | T3a | NO | MO | 45.2                  | Dead   |
| 51 | M      | 69  | no         | ccRCC     | I     | III   | 5×4.5×4.5       | T1b | NO | MO | 84.39                 | Alive  |
| 52 | M      | 73  | no         | ccRCC     | I     | II    | 2.5×2.5×2       | T1a | NO | MO | 83.97                 | Alive  |
| 53 | F      | 68  | no         | ccRCC     | I     | II    | 4.5×4.5×4       | T1b | NO | MO | 83.74                 | Alive  |
| 54 | M      | 71  | no         | ccRCC     | I     | II    | 5×5×4.5         | T1b | NO | MO | 83.74                 | Alive  |
| 55 | F      | 65  | no         | ccRCC     | I     | I     | 5×3.5×4         | T1b | NO | MO | 83.34                 | Alive  |
| 56 | M      | 86  | no         | ccRCC     | II    | III   | 9.5×7×5.5       | T2a | NO | MO | 33.80                 | Dead   |
| 57 | M      | 65  | no         | ccRCC     | II    | III   | 10×6×6          | T2a | NO | MO | 37.2                  | Dead   |
| 58 | M      | 61  | no         | ccRCC     | I     | I     | 3.5×3×2.5       | T1a | NO | MO | 82.62                 | Alive  |
| 59 | F      | 72  | no         | ccRCC     | I     | II    | 5×4.5×4         | T1b | NO | MO | 82.07                 | Alive  |
| 60 | M      | 58  | no         | ccRCC     | I     | I     | 4.5×4×3.8       | T1b | NO | MO | 82.03                 | Alive  |
| 61 | M      | 68  | no         | ccRCC     | III   | IV    | 6.5×6.5×5.5     | T3a | NO | MO | 11.3                  | Dead   |
| 62 | M      | 74  | no         | ccRCC     | II    | III   | 8×8×5           | T2a | NO | MO | 81.25                 | Alive  |
| 63 | M      | 38  | no         | ccRCC     | III   | IV    | 5.5×4.5×4       | T3a | NO | MO | 12.6                  | Dead   |
| 64 | M      | 33  | no         | ccRCC     | I     | III   | 7×6×5           | T1b | NO | MO | 80.79                 | Alive  |
| 65 | M      | 75  | no         | ccRCC     | I     | II    | 4×3×2.5         | T1a | NO | MO | 80.59                 | Alive  |
| 66 | F      | 64  | no         | ccRCC     | I     | II    | 6.5×5.5×5       | T1b | NO | MO | 80.56                 | Alive  |
| 67 | F      | 59  | no         | ccRCC     | I     | I     | 3×3×2.5         | T1a | NO | MO | 80.26                 | Alive  |
| 68 | M      | 59  | no         | ccRCC     | I     | II    | 3.5×3.5×2.5     | T1a | NO | MO | 80.13                 | Alive  |
| 69 | M      | 58  | no         | ccRCC     | I     | I     | 4.5×4.5×4       | T1b | NO | MO | 79.67                 | Alive  |
| 70 | M      | 55  | no         | ccRCC     | I     | II    | 4×3×2.5         | T1a | NO | MO | 79.64                 | Alive  |
| 71 | F      | 81  | no         | ccRCC     | I     | II    | 6×5.5×4.5       | T1b | NO | MO | 6.6                   | Dead   |
| 72 | F      | 59  | no         | ccRCC     | I     | I     | 5.5×5×5         | T1b | NO | MO | 79.44                 | Alive  |
| 73 | M      | 60  | no         | ccRCC     | III   | III   | 7×5×5           | T3a | NO | MO | 15.7                  | Dead   |
| 74 | M      | 67  | no         | ccRCC     | I     | II    | 6×5×5           | T1b | NO | MO | 78.30                 | Alive  |
| 75 | M      | 34  | no         | ccRCC     | III   | II    | 13×6.5×5.5      | T3a | NO | MO | 3.9                   | Dead   |
| 76 | M      | 48  | no         | ccRCC     | III   | III   | 5.5×4.5×4       | T3a | NO | MO | 15.2                  | Dead   |
| 77 | M      | 63  | no         | ccRCC     | I     | III   | 5×4×2           | T1b | NO | MO | 77.61                 | Alive  |
| 78 | F      | 70  | no         | ccRCC     | I     | II    | 6×5×4           | T1b | NO | MO | 77.51                 | Alive  |
| 79 | M      | 65  | no         | ccRCC     | III   | II    | 8×7×6           | T3a | NO | MO | 10.2                  | Dead   |

**Table S4. siRNA sequence used in the study**

| siRNA     | Sequence                                                       |
|-----------|----------------------------------------------------------------|
| METTL14-1 | S: GCAAAGATGAGCAGAGAGAAATTGCT<br>AS: AGCAATTTCTCTCTGCTCATCTTTG |
| METTL14-2 | S: GGGAGCTCATCAGGCTAAAGGATGA<br>AS: TCATCCTTTAGCCTGATGAGCTCCC  |
| ESRP2     | S: AGCCCGAGGTGATAAAGCA<br>AS: TGCTTTATCACCTCGGGCT              |
| YTHDC1    | S: CGACCAGAAGATTATGATA<br>AS: GCTGGTCTTCTAATACTAT              |

**Table S5. Primers used in RT-qPCR**

| Primers  | Sequence                                                            |
|----------|---------------------------------------------------------------------|
| METTL3   | F: ATCCCAAGGCTTCAACCAG<br>R: GCGAGTGCCAGGAGATAGTC                   |
| METTL14  | F: TCCCCATAATGATTACTGC<br>R: CTGATGTCAAAGGCTTCTAT                   |
| WTAP     | F: CTTCCAAGAAGGTTTCGATTGA<br>R: TCAGACTCTCTTAGGCCAGTTAC             |
| ALKBH5   | F: GGCCGTATGCAGTGAGTGATT<br>R: TGTCCGTGTCCTTCTTTAGCG                |
| FTO      | F: TCAGCAGTGGCAGCTGAAAT<br>R: CTTGGATCCTCACCACGTCC                  |
| Lnc-LSG1 | F: CTTGTGCCTCAGAATCATCATAGAC<br>R: CCAGAAGGTGTTAATCATCATCACT        |
| ESRP2    | F: TGGTGTGGCCCTCTGTCTCAAC<br>R: GCCCCCTGCAATCTTTACGAA               |
| YTHDC1   | F: CACCAGAGACCAGGGTATTTAAAGGATC<br>R: CATTCTTGCCAAGGTGGTGGTGGTCCCAT |
| GAPDH    | F: GTGAAGCAGGCGTCGGA<br>R: AGCCCCAGCGTCAAAGG                        |

**Table S6. The m6A level of lncRNAs downregulated in 786-O and Caki-1 shMETTL14-1 cells**

|                      |                |
|----------------------|----------------|
| lnc-SKIL-3           | lnc-PHLDA1-1   |
| OTUD6B-AS1           | lnc-ANKRD55-6  |
| lnc-IL17B-2          | NCK1-DT        |
| lnc-TMEM160-1        | lnc-CARHSP1-1  |
| lnc-ZFC3H1-10        | lnc-SMARCC1-3  |
| lnc-CA8-13           | PCBP1-AS1      |
| lnc-KLF10-2          | lnc-TCFL5-6    |
| lnc-UBE2Q1-2         | lnc-FAM136A-1  |
| lnc-FAM84B-20        | lnc-SPOCD1-2   |
| FGD5-AS1             | lnc-EIF2AK4-6  |
| lnc-EBF1-4           | lnc-LBR-4      |
| lnc-LGALS3BP-2       | lnc-RFNG-2     |
| lnc-PDE4D-7          | lnc-SLC25A30-4 |
| TUG1                 | lnc-TRIM37-1   |
| lnc-PCDH15-2         | lnc-JUNB-1     |
| DDIT4-AS1            | lnc-C1orf141-2 |
| lnc-ZNF121-1         | lnc-SLC25A32-4 |
| lnc-GTF2A2-6         | lnc-PFDN2-1    |
| lnc-FAM92B-6         | lnc-FSCN2-3    |
| lnc-FOXS1-2          | lnc-STAT1-2    |
| VCAN-AS1             | lnc-MRPL24-2   |
| lnc-PRELID3B-3       | lnc-SLC45A3-2  |
| lnc-TAF12-5          | lnc-PPP5D1-1   |
| lnc-LSG1-4           | NORAD          |
| lnc-FAM166A-3        | lnc-BAZ2A-2    |
| lnc-MFSD8-8          | lnc-RAB3IL1-2  |
| NEAT1                | lnc-CLMP-3     |
| lnc-STPG4-3          | lnc-RPL17-2    |
| lnc-SLC43A3-1        | lnc-NFS1-1     |
| lnc-EMC1-1           | lnc-ZBED5-4    |
| lnc-MGLL-5           | lnc-CA1-3      |
| lnc-TMEM189-UBE2V1-4 | lnc-TLDC1-2    |
| lnc-CEP152-1         | lnc-ARHGEF2-3  |
| lnc-ZDHHC7-2         | lnc-MAP4K2-3   |
| lnc-CDC42BPB-4       | MALAT1         |
| lnc-RNF39-9          | lnc-LTBP3-2    |
| lnc-CCDC57-6         | lnc-ISG15-5    |
| lnc-ARID2-11         | lnc-PADI2-1    |
| lnc-EEF1E1-2         | lnc-TSC1-1     |
| lnc-CTSZ-7           | lnc-S100A11-2  |
| lnc-SHANK2-5         | lnc-SAMD11-14  |
| lnc-TXNDC16-3        | lnc-PASK-2     |
| PSMA3-AS1            | lnc-C8orf89-3  |
| lnc-ANKUB1-2         | lnc-C9orf64-1  |
| lnc-TFEC-5           | lnc-MOS-1      |
| lnc-TRPA1-2          | lnc-PDGFB-4    |
| lnc-ITGA11-6         | lnc-SKAP2-6    |
| lnc-DCAF1-1          | lnc-ITGB1BP2-2 |
| lnc-FRMD5-1          |                |
| lnc-SUMF1-18         |                |
| lnc-HNRNPU-1         |                |
| lnc-PUM2-3           |                |
| lnc-C5orf60-3        |                |
| lnc-TNPO2-1          |                |
| lnc-ENPP1-5          |                |
| LINC00958            |                |
| lnc-CALCRL-2         |                |
| lnc-SAMD11-13        |                |
| lnc-PAQR7-1          |                |

| <b>Abbreviations list</b> |                                               |
|---------------------------|-----------------------------------------------|
| <b>Abbreviations</b>      | <b>Full name</b>                              |
| ccRCC                     | Clear cell renal carcinoma                    |
| m6A                       | N6-methyladenosine                            |
| METTTL14                  | methyltransferase 14                          |
| METTTL3                   | methyltransferase 3                           |
| WTAP                      | WT1 associated protein                        |
| FTO                       | fat mass and obesity associated               |
| ALKBH5                    | alkB homolog 5                                |
| TCGA                      | The Cancer Genome Atlas                       |
| CNVs                      | copy number variations                        |
| OS                        | overall survival                              |
| DFS                       | disease-free survival                         |
| lncRNA                    | long non-coding RNA                           |
| MeRIP-seq                 | methylated RNA immunoprecipitation sequencing |
| ESRP2                     | epithelial splicing regulatory protein 2      |
| YTHDC1                    | YTH domain containing 1                       |
| IHC                       | immunohistochemistry                          |
| FISH                      | fluorescence in situ hybridization            |
| HE                        | hematoxylin and eosin staining                |
| CHX                       | cycloheximide                                 |
| CQ                        | chloroquine                                   |
| FGFR2                     | fibroblast growth factor receptor 2           |
